# Supplementary material for: Association Between Residential Greenness, Cardiometabolic Disorders, and Cardiovascular Disease Among Adults in China
Source: PubMed Central journal article supplement (PMC7506516; doi:10.1001/jamanetworkopen.2020.17507), 2020-09-21
Supplement: jamanetwopen-e2017507-s001.pdf [file jamanetwopen-e2017507-s001.pdf]

## Supplementary Online Content

Yang B-Y, Hu L-W, Jalaludin B, et al. Association between residential greenness, cardiometabolic disorders, and cardiovascular disease among adults in China. *JAMA Netw Open*. 2020;3(9):e2017507. doi:10.1001/jamanetworkopen.2020.17507

**eTable 1.** Previous Human Epidemiological Studies of Greenness Exposure and CVD Mortality and Morbidity

**eTable 2.** Characteristics of Study Participants With and Without Blood Sampling

**eTable 3.** Main Characteristics of Study Participants With and Without CVD

**eTable 4.** Distributions and Intercorrelations (Spearman Correlation Coefficients) of NDVI and SAVI

**eTable 5.** Sensitivity Analyses of Associations Between Greenness Measures and CVD Prevalence Using Different Adjusted Models

**eTable 6.** Associations Between Quartiles of Greenness Measures and CVD Prevalence

**eTable 7.** Associations of Greenness With CVD Prevalence by Age, Sex, and Annual Household Income

**eTable 8.** Mediation of Association Between Greenness and CVD Prevalence by Combined Cardiometabolic Disorders

**eFigure 1.** Directed Acyclic Graph for the Association Between Greenness and CVD

**eFigure 2.** Directed Acyclic Graph for the Association Between Greenness and Cardiometabolic Disorders

**eFigure 3.** Directed Acyclic Graph for the Association Between Cardiometabolic Disorders and CVD

**eFigure 4.** Three-Way Decomposition Encompassing Decompositions for Both Mediation and Interaction

**eFigure 5.** Dose-Response Curves for Greenness Levels With CVD Prevalence

### eReferences

This supplementary material has been provided by the authors to give readers additional information about their work.

**eTable 1.** Previous Human Epidemiological Studies of Greenness Exposure and CVD Mortality and Morbidity

| Author (Year)                               | Sample size  | Study design    | Study setting | Exposure                                                                       | Outcome          | Main findings                                                                                                                                                          |
|---------------------------------------------|--------------|-----------------|---------------|--------------------------------------------------------------------------------|------------------|------------------------------------------------------------------------------------------------------------------------------------------------------------------------|
| Hu et al. (2008) <sup>1</sup>               | Not reported | Cross-sectional | USA           | Distance to and frequency of visiting green space; satellite-derived greenness | Stroke mortality | High risk of stroke mortality was found in areas with low level of exposure to green space                                                                             |
| Mitchell et al. (2008) <sup>2</sup>         | 40,813,236   | Cross-sectional | England       | Percentage of greenspace                                                       | CVD mortality    | Lower mortality incidence rate ratio was associated with higher levels of green space                                                                                  |
| Mass et al. (2009) <sup>3</sup>             | 345,143      | Cross-sectional | Dutch         | Percentage of green space                                                      | CVD prevalence   | More green space within a 1 km radius around the postal code coordinates was associated with lower odds of CVD prevalence                                              |
| Richardson et al. (2010) <sup>4</sup>       | 1,546,405    | Ecological      | New Zealand   | Percent coverage of green space types                                          | CVD mortality    | No significant association was observed for usable or total green space with CVD mortality                                                                             |
| Dominguez-Berjon et al. (2010) <sup>5</sup> | 5,423,384    | Cross-sectional | Spain         | Dearth of green space (surveyed using questionnaire)                           | CVD mortality    | Lack of green space was associated with higher risk of death due to ischemic heart disease in men, and with death due to cerebrovascular disease in both men and women |
| Coutts et al. (2010) <sup>6</sup>           | Not reported | Cross-sectional | USA           | Amount of greenspace within defined distance                                   | CVD mortality    | The amount of greenspace within defined distances of census tract in each county was associated with CVD mortality                                                     |
| Richardson et al. (2010) <sup>7</sup>       | 28.6 million | Cross-sectional | UK            | Proportion of greenspace by area                                               | CVD mortality    | CVD mortality rates decreased with increasing green space only in males.                                                                                               |
| Richardson et al. (2012) <sup>8</sup>       | 43 million   | Cross-sectional | USA           | Population weighted green space coverage                                       | CVD mortality    | No association was observed between green space coverage and CVD mortality                                                                                             |
| Pereira et al. (2012) <sup>9</sup>          | 11,404       | Cross-sectional | Australia     | NDVI                                                                           | CVD prevalence   | Levels and variability of greenness were inversely associated with                                                                                                     |

|                                        |          |                    |             |                                                                     |                             |                                                                                                                                                         |
|----------------------------------------|----------|--------------------|-------------|---------------------------------------------------------------------|-----------------------------|---------------------------------------------------------------------------------------------------------------------------------------------------------|
|                                        |          |                    |             |                                                                     |                             | prevalence of coronary heart disease and stroke.                                                                                                        |
| Donovan et al. (2013) <sup>10</sup>    | 21,080   | Natural experiment | USA         | The emerald ash borer, an invasive forest pest                      | CVD mortality               | Loss of trees (i.e., reduction in greenness) to the emerald ash borer increased mortality related to cardiovascular illness.                            |
| Richardson et al. (2013) <sup>11</sup> | 8157     | Cross-sectional    | New Zealand | Proportion of green space within each census area unit              | CVD prevalence              | CVD risk was reduced in all neighborhoods with >15% greenspace availability (e.g. OR 0.80, 95% CI, 0.64-0.99 for those with 33-70% green space).        |
| Tamosiunas et al. (2014) <sup>12</sup> | 5112     | Cohort             | Lithuania   | Distance to the nearest green space                                 | CVD incidence and mortality | Distance to green space was significantly associated with fatal and non-fatal CVD                                                                       |
| Lzchowycz et al. (2014) <sup>13</sup>  | 165,424  | Cross-sectional    | England     | Percentage of greenspace                                            | CVD mortality               | Decreased premature circulatory mortality was found in greener areas, especially in those most deprived group.                                          |
| Wilker et al. (2014) <sup>14</sup>     | 1763     | Cohort             | USA         | NDVI                                                                | CVD mortality               | Compared with stroke patients living in the lowest quartile of green space, those living in the highest quartile of green space had lower risk of death |
| Bixby et al. (2015) <sup>15</sup>      | ≥100,000 | Cross-sectional    | England     | Proportion of city area covered by "green" land                     | CVD mortality               | No significant association was observed between green space proportion and CVD mortality                                                                |
| Chum et al. (2015) <sup>16</sup>       | 2411     | Cross-sectional    | Canada      | Proportion of parks and recreational areas within each census tract | CVD prevalence              | No significant association was observed between proportion of parks and recreational areas and CVD prevalence.                                          |
| Donovan et al. (2015) <sup>17</sup>    | 156,146  | Cohort             | USA         | The emerald ash borer                                               | CVD incidence               | Women living in a county infested with emerald ash borer had an increased risk of CVD                                                                   |
| James et al. (2016) <sup>18</sup>      | 108,630  | Cohort             | USA         | NDVI                                                                | CVD mortality               | Higher levels of green vegetation were associated with decreased mortality                                                                              |
| Massa et al. (2016) <sup>19</sup>      | 1333     | Cross-sectional    | Brazil      | Total green area per square meter                                   | CVD prevalence              | In comparison to participants living with the low green space levels, those in higher levels were                                                       |

|                                          |             |                 |             |                                           |                              |                                                                                                                                                                                                                                                                         |
|------------------------------------------|-------------|-----------------|-------------|-------------------------------------------|------------------------------|-------------------------------------------------------------------------------------------------------------------------------------------------------------------------------------------------------------------------------------------------------------------------|
|                                          |             |                 |             |                                           |                              | significantly less likely to report having a CVD.                                                                                                                                                                                                                       |
| Ngom et al. (2016) <sup>20</sup>         | 3,920,000   | Cross-sectional | Canada      | The nearest distance to green spaces      | CVD prevalence               | Among the various green space types, only green spaces with sport facilities showed a significant relationship with diabetes and cerebrovascular disease morbidity                                                                                                      |
| Picavet et al. (2016) <sup>21</sup>      | 12,546      | Cross-sectional | Netherlands | Percentage of green space                 | CVD prevalence               | No significant association was observed between percentage of green space and CVD prevalence                                                                                                                                                                            |
| Vienneau et al. (2017) <sup>22</sup>     | 4.2 million | Cohort          | Switzerland | NDVI; land use green exposure             | CVD mortality                | Higher NDVI levels were associated with lower CVD mortality                                                                                                                                                                                                             |
| Wang et al. (2017) <sup>23</sup>         | 3544        | Cohort          | China       | NDVI                                      | CVD mortality                | A 10% increase in coverage of green space was significantly associated with a reduction in all-cause mortality                                                                                                                                                          |
| Yitshak-Sade et al. (2017) <sup>24</sup> | 23,110      | Cross-sectional | Israel      | NDVI                                      | CVD prevalence               | NDVI was associated with myocardial infarction                                                                                                                                                                                                                          |
| Crouse et al. (2017) <sup>25</sup>       | 1,265,000   | Cohort          | Canada      | NDVI                                      | CVD prevalence and mortality | Per 0.15-unit increase in NDVI-250m was significantly associated with 0.960 (95% CI: 0.943-0.976), 0.949 (95% CI: 0.927-0.972), and 1.042 (95% CI: 0.963-1.047)-fold risk of cardiovascular disease, ischemic heart disease, and cerebrovascular disease, respectively. |
| Jia et al. (2018) <sup>26</sup>          | 1944        | Cross-sectional | China       | NDVI                                      | CVD prevalence               | Compared to the participants with low NDVI level, participants with moderate to high levels of NDVI had a 75% and 45% reduced odds of coronary heart disease and stroke, respectively                                                                                   |
| Silveira et al. (2018) <sup>27</sup>     | 6,230,446   | Cross-sectional | Brazil      | NDVI                                      | CVD mortality                | Mortality rates for CVD are inversely associated with greenness exposure                                                                                                                                                                                                |
| Astell-Burt et al. (2019) <sup>28</sup>  | 46,786      | Cohort          | Australia   | Percentage of green space and tree canopy | CVD incidence                | Larger percentage of tree canopy, but not green space, was associated with lower odds of incident CVD.                                                                                                                                                                  |

|                                      |                                                                 |                 |           |                                                 |                |                                                                                                                                                                                                                                                                                                                             |
|--------------------------------------|-----------------------------------------------------------------|-----------------|-----------|-------------------------------------------------|----------------|-----------------------------------------------------------------------------------------------------------------------------------------------------------------------------------------------------------------------------------------------------------------------------------------------------------------------------|
| Orioli et al. (2019) <sup>29</sup>   | 1,263,721                                                       | Cohort          | Italy     | NDVI and LAI                                    | CVD mortality  | Residential greenness, expressed as NDVI and LAI, was inversely associated with stroke incidence and cardiovascular mortality.                                                                                                                                                                                              |
| Kim et al. (2019) <sup>30</sup>      | 73 districts with an average population per district of 317,869 | Time-series     | Korea     | NDVI                                            | CVD mortality  | High level of greenness was associated with decreased risk of CVD-related mortality                                                                                                                                                                                                                                         |
| Servadio et al. (2019) <sup>31</sup> | 169 census tracts                                               | Cross-sectional | USA       | Park access and tree canopy cover               | CVD prevalence | Greater percent tree canopy cover and green space access were associated with higher prevalence of coronary heart disease and stroke.                                                                                                                                                                                       |
| Wang et al. (2019) <sup>32</sup>     | 249,405                                                         | Cross-sectional | USA       | NDVI                                            | CVD prevalence | Compared with the lowest tertile of greenness, the highest tertile of greenness was associated with reduced odds of acute myocardial infarction by 25%, ischaemic heart disease by 20%, heart failure by 16%, and atrial fibrillation by 6%. Additional adjustment for biological risk factors attenuated the associations. |
| Zijlema et al. (2019) <sup>33</sup>  | 9218                                                            | Cohort          | Australia | NDVI, number and size of parks and nature space | CVD mortality  | Access to natural spaces was associated with decreased mortality                                                                                                                                                                                                                                                            |

Abbreviations: CI, confidence interval; CVD, cardiovascular disease; LAI, the leaf area index; NDVI, the normalized difference vegetation index; NP, not reported; OR, odds ratio; USA, the United States of America.

**eTable 2.** Characteristics of Study Participants With and Without Blood Sampling

| <b>Characteristic</b>            | <b>Participants with blood sampling (n = 15 477)</b> | <b>Participants without blood sampling (n = 9368)</b> |
|----------------------------------|------------------------------------------------------|-------------------------------------------------------|
| Age (years, mean $\pm$ SD)       | 45.0 $\pm$ 13.5                                      | 45.7 $\pm$ 13.0                                       |
| Gender, No. (%)                  |                                                      |                                                       |
| Men                              | 8156 (52.7)                                          | 4505 (48.1)                                           |
| Women                            | 7321 (47.3)                                          | 4863 (51.9)                                           |
| Ethnicity, No. (%)               |                                                      |                                                       |
| Han                              | 14 554 (94.0)                                        | 8916 (95.2)                                           |
| Others                           | 923 (6.0)                                            | 452 (4.8)                                             |
| Education, No. (%)               |                                                      |                                                       |
| $\leq$ 9 years                   | 11 898 (76.9)                                        | 7472 (79.8)                                           |
| $>$ 9 years                      | 3579 (23.1)                                          | 1896 (20.2)                                           |
| Annual household income, No. (%) |                                                      |                                                       |
| $\leq$ 10 000 Yuan               | 3144 (20.3)                                          | 2617 (27.9)                                           |
| $>$ 10 000 Yuan                  | 12 333 (79.7)                                        | 6751 (72.1)                                           |

Abbreviations: SD, standard deviation.

**eTable 3.** Main Characteristics of Study Participants With and Without CVD (N = 24 845)

| Characteristic                  | CVD<br>(n = 1006) <sup>a</sup> | Non-CVD<br>(n = 23 839) | P value |
|---------------------------------|--------------------------------|-------------------------|---------|
| Age, No.(%)                     |                                |                         | <.001   |
| <50 years                       | 257 (25.5)                     | 15 246 (64.0)           |         |
| ≥50 years                       | 749 (75.5)                     | 8593 (36.0)             |         |
| Gender, No.(%)                  |                                |                         | <.001   |
| Men                             | 743 (73.9)                     | 11 918 (50.0)           |         |
| Women                           | 263 (26.1)                     | 11 921 (50.0)           |         |
| Ethnicity, No.(%)               |                                |                         | <.001   |
| Han                             | 980 (97.4)                     | 22 490 (94.3)           |         |
| Others                          | 26 (2.6)                       | 1349 (5.7)              |         |
| Education, No.(%)               |                                |                         | <.001   |
| ≤ 9 years                       | 836 (93.1)                     | 18 534 (77.8)           |         |
| > 9 years                       | 170 (16.9)                     | 5305 (22.3)             |         |
| Annual household income, No.(%) |                                |                         | <.001   |
| ≤10 000 Yuan                    | 366 (36.4)                     | 5395 (22.6)             |         |
| >10 000 Yuan                    | 640 (63.6)                     | 18 444 (77.4)           |         |

Abbreviations: CVD, cardiovascular disease.

<sup>a</sup>CVD patients included 417 participants with heart disease, 529 with stroke, and 60 with both.

**eTable 4.** Distributions and Intercorrelations (Spearman Correlation Coefficients) of NDVI and SAVI

|                         | <b>Median (IQR)</b> | <b>Min</b> | <b>Max</b> | <b>NDVI<sub>500 m</sub></b> | <b>NDVI<sub>1000 m</sub></b> | <b>SAVI<sub>500 m</sub></b> | <b>SAVI<sub>1000 m</sub></b> |
|-------------------------|---------------------|------------|------------|-----------------------------|------------------------------|-----------------------------|------------------------------|
| NDVI <sub>500 -m</sub>  | 0.29 (0.17)         | 0.18       | 0.80       | 1                           | 0.90 <sup>a</sup>            | 0.98 <sup>a</sup>           | 0.88 <sup>a</sup>            |
| NDVI <sub>1000 -m</sub> | 0.31 (0.15)         | 0.20       | 0.75       |                             | 1                            | 0.88 <sup>a</sup>           | 0.96 <sup>a</sup>            |
| SAVI <sub>500- m</sub>  | 0.16 (0.11)         | 0.10       | 0.48       |                             |                              | 1                           | 0.90 <sup>a</sup>            |
| SAVI <sub>1000 -m</sub> | 0.17 (0.10)         | 0.11       | 0.45       |                             |                              |                             | 1                            |

Abbreviations: IQR, interquartile range (computed by subtracting the 1<sup>st</sup> quartile from the 3<sup>rd</sup> quartile); max, maximum; min, minimum; NDVI, normalized difference vegetation index; SAVI, soil adjusted vegetation index.

<sup>a</sup>Statistically significant correlation ( $P < .05$ ).



**eTable 5.** Sensitivity Analyses of Associations Between Greenness Measures and CVD Prevalence Using Different Adjusted Models (N = 24 845)<sup>a</sup>

| Model                                                  | NDVI <sub>500-m</sub> |         | SAVI <sub>500-m</sub> |         |
|--------------------------------------------------------|-----------------------|---------|-----------------------|---------|
|                                                        | OR (95% CI)           | P value | OR (95% CI)           | P value |
| Main model <sup>b</sup>                                | 0.73 (0.65, 0.83)     | <.0001  | 0.74 (0.66, 0.84)     | <.0001  |
| Main model <sup>b</sup> + alcohol drinking             | 0.74 (0.65, 0.83)     | <.0001  | 0.74 (0.66, 0.84)     | <.0001  |
| Main model <sup>b</sup> + cigarette smoking            | 0.73 (0.64, 0.86)     | <.0001  | 0.73 (0.65, 0.83)     | <.0001  |
| Main model <sup>b</sup> + low-calorie and low-fat diet | 0.73 (0.65, 0.82)     | <.0001  | 0.74 (0.65, 0.83)     | <.0001  |
| Main model <sup>b</sup> + sugar-sweetened soft drinks  | 0.73 (0.64, 0.82)     | <.0001  | 0.73 (0.65, 0.83)     | <.0001  |
| Main model <sup>b</sup> + family history of CVD        | 0.73 (0.65, 0.82)     | <.0001  | 0.74 (0.65, 0.83)     | <.0001  |
| Model 1 <sup>c</sup>                                   | 0.71 (0.63, 0.80)     | <.0001  | 0.72 (0.64, 0.81)     | <.0001  |
| Model 2 <sup>d</sup>                                   | 0.71 (0.63, 0.80)     | <.0001  | 0.71 (0.63, 0.81)     | <.0001  |
| Model 3 <sup>e</sup>                                   | 0.70 (0.62, 0.79)     | <.0001  | 0.70 (0.62, 0.79)     | <.0001  |

Abbreviations: CI, confidence interval; CVD, cardiovascular disease; NDVI, normalized difference vegetation index; OR, odds ratio; SAVI, soil adjusted vegetation index

<sup>a</sup>Greenness per IQR Increase in NDVI<sub>500-m</sub> and SAVI<sub>500-m</sub>.

<sup>b</sup>Adjusted for age, gender, ethnicity, household income, education, district-level of gross domestic product, physical activity, and air pollution (PM<sub>2.5</sub>).

<sup>c</sup>Adjusted for age, gender, ethnicity, and community size

<sup>d</sup>Adjusted for age, gender, ethnicity, community size, education, household income, and district-level of gross domestic product

<sup>e</sup>Adjusted for age, gender, ethnicity, community size, education, household income, and district-level of gross domestic product, smoking status, physical activity level, low-calorie and low-fat diet, sugar-sweetened soft drinks, alcohol drinking, and family history of CVD.

**eTable 6.** Associations Between Quartiles of Greenness Measures and CVD Prevalence (N = 24 845)

| Greenness measure     | Adjusted OR (95% CI) <sup>a</sup> | P value for trend |
|-----------------------|-----------------------------------|-------------------|
| NDVI <sub>500-m</sub> |                                   | <.0001            |
| Q <sub>1</sub>        | Referent                          |                   |
| Q <sub>2</sub>        | 1.03 (0.86, 1.23)                 |                   |
| Q <sub>3</sub>        | 0.66 (0.55, 0.80)                 |                   |
| Q <sub>4</sub>        | 0.63 (0.50, 0.79)                 |                   |
| SAVI <sub>500-m</sub> |                                   | <.0001            |
| Q <sub>1</sub>        | Referent                          |                   |
| Q <sub>2</sub>        | 0.72 (0.61, 0.86)                 |                   |
| Q <sub>3</sub>        | 0.55 (0.45, 0.67)                 |                   |
| Q <sub>4</sub>        | 0.58 (0.48, 0.71)                 |                   |

Abbreviations: CI, confidence interval; CVD, cardiovascular disease; NDVI, normalized difference vegetation index; OR, odds ratio; SAVI, soil adjusted vegetation index

<sup>a</sup>Adjusted for age, gender, ethnicity, household income, education, district-level of gross domestic product, physical activity, and air pollution.

**eTable 7.** Associations of Greenness With CVD Prevalence by Age, Sex, and Annual Household Income (N = 24 845)<sup>a</sup>

|                         | <b>NDVI<sub>500-m</sub></b>    |                                | <b>SAVI<sub>500-m</sub></b>    |                                |
|-------------------------|--------------------------------|--------------------------------|--------------------------------|--------------------------------|
| <b>Subgroup</b>         | <b>OR (95% CI)<sup>b</sup></b> | <b>P<sub>interaction</sub></b> | <b>OR (95% CI)<sup>b</sup></b> | <b>P<sub>interaction</sub></b> |
| Age                     |                                | .39                            |                                | .41                            |
| <50 years               | 0.71 (0.58 to 0.86)            |                                | 0.71 (0.58 to 0.87)            |                                |
| ≥50 years               | 0.78 (0.68 to 0.90)            |                                | 0.79 (0.68 to 0.91)            |                                |
| Gender                  |                                | .83                            |                                | .81                            |
| Men                     | 0.76 (0.66 to 0.88)            |                                | 0.77 (0.66 to 0.89)            |                                |
| Women                   | 0.74 (0.61 to 0.90)            |                                | 0.75 (0.61 to 0.91)            |                                |
| Annual household income |                                | .32                            |                                | .33                            |
| <10 000 Yuan            | 0.82 (0.66 to 1.01)            |                                | 0.83 (0.67 to 1.02)            |                                |
| ≥10 000 Yuan            | 0.73 (0.63 to 0.83)            |                                | 0.73 (0.64 to 0.84)            |                                |
| Education               |                                | .06                            |                                | .09                            |
| <9 years                | 0.79 (0.69 to 0.90)            |                                | 0.80 (0.70 to 0.91)            |                                |
| ≥9 years                | 0.60 (0.45 to 0.79)            |                                | 0.61 (0.46 to 0.81)            |                                |

Abbreviations: CI, confidence interval; CVD, cardiovascular disease; IQR, interquartile range; NDVI, normalized difference vegetation index; OR, odds ratio; SAVI, soil adjusted vegetation index.

<sup>a</sup>Greenness per IQR in in NDVI<sub>500-m</sub> and NDVI<sub>500-m</sub>.

<sup>b</sup>Adjusted for age, sex, ethnicity, household income, education, district-level of gross domestic product, physical activity, and air pollution (PM<sub>2.5</sub>), except the variable that were stratified.

**eTable 8.** Mediation of Association Between Greenness and CVD Prevalence by Combined Cardiometabolic Disorders<sup>a</sup>

|                       | Indirect effect         |         | Direct effect           |         |  |
|-----------------------|-------------------------|---------|-------------------------|---------|--|
|                       | % (95% CI) <sup>b</sup> | P value | % (95% CI) <sup>b</sup> | P value |  |
| NDVI <sub>500-m</sub> | 21.2 (6.4 to 35.9)      | .004    | 78.8 (64.1 to 93.4)     | <.001   |  |
| SAVI <sub>500-m</sub> | 21.3 (7.4 to 35.2)      | .003    | 78.7 (64.8 to 92.6)     | <.001   |  |

Abbreviations: CI, confidence interval; CVD, cardiovascular disease; NDVI, normalized difference vegetation index; SAVI, soil adjusted vegetation index.

<sup>a</sup>Cardiovascular disorders included hypertension, diabetes, overweight/obesity, hypercholesterolemia, hypertriglyceridemia, and high LDL-C, which are individually significantly mediated the association between greenness and CVD prevalence.

<sup>b</sup>Adjusted for age, gender, education, ethnicity, household income, physical activity, district-level gross domestic product, and air pollution (PM<sub>2.5</sub>).

**eFigure 1.** Directed Acyclic Graph for the Association Between Greenness and CVD

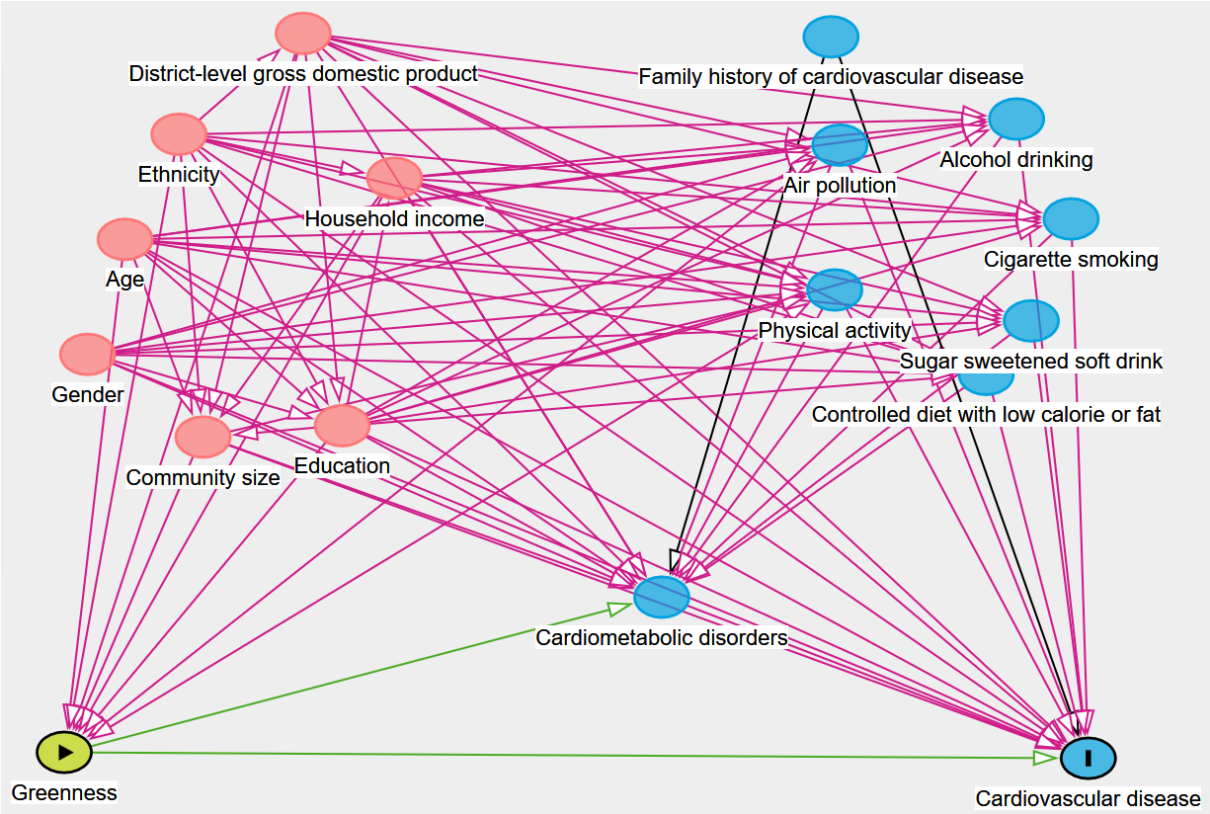

Created with the help of DAGitty.net ([www.dagitty.net](http://www.dagitty.net)). Minimally sufficient adjustment set: age, sex, ethnicity, education, household income, physical activity, district-level gross domestic product, and air pollution (PM<sub>2.5</sub>).

**eFigure 2.** Directed Acyclic Graph for the Association Between Greenness and Cardiometabolic Disorders

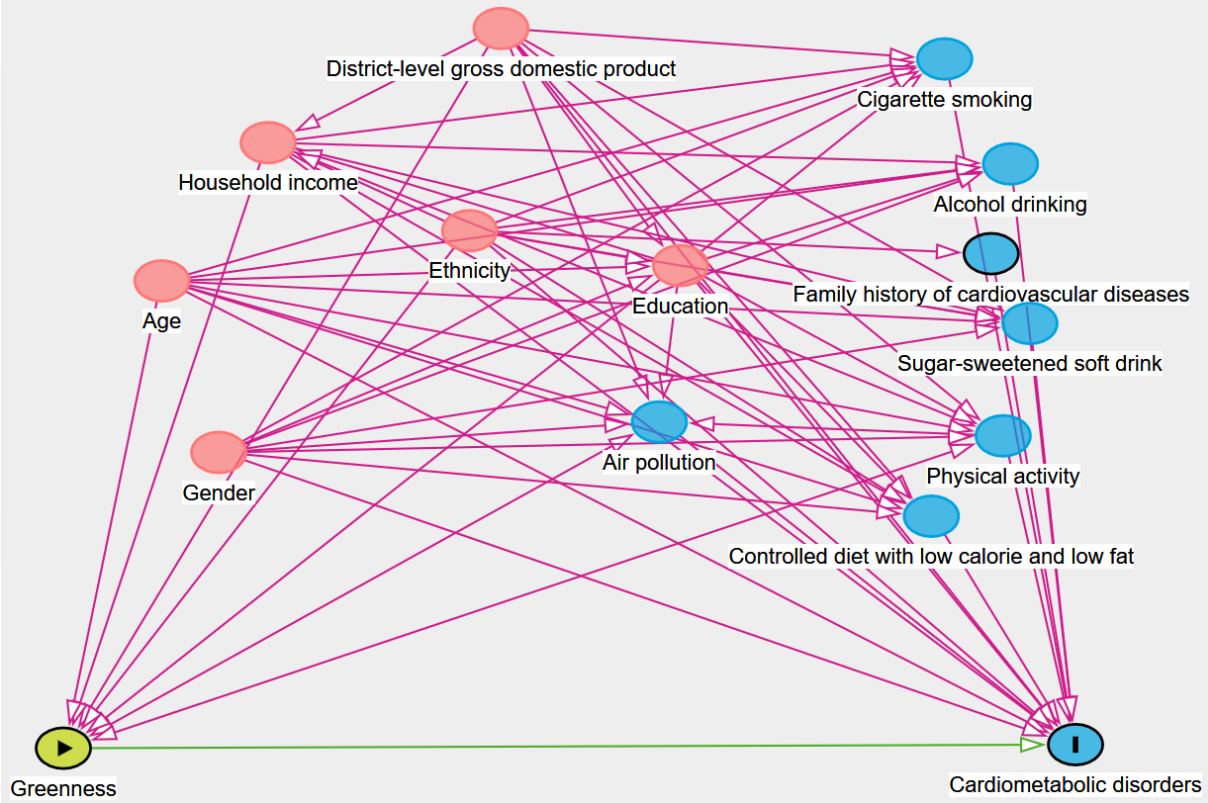

Created with the help of DAGitty.net ([www.dagitty.net](http://www.dagitty.net)). Minimally sufficient adjustment set: age, sex, ethnicity, education, household income, physical activity, district-level product, and air pollution (PM<sub>2.5</sub>).

**eFigure 3.** Directed Acyclic Graph for the Association Between Cardiometabolic Disorders and CVD

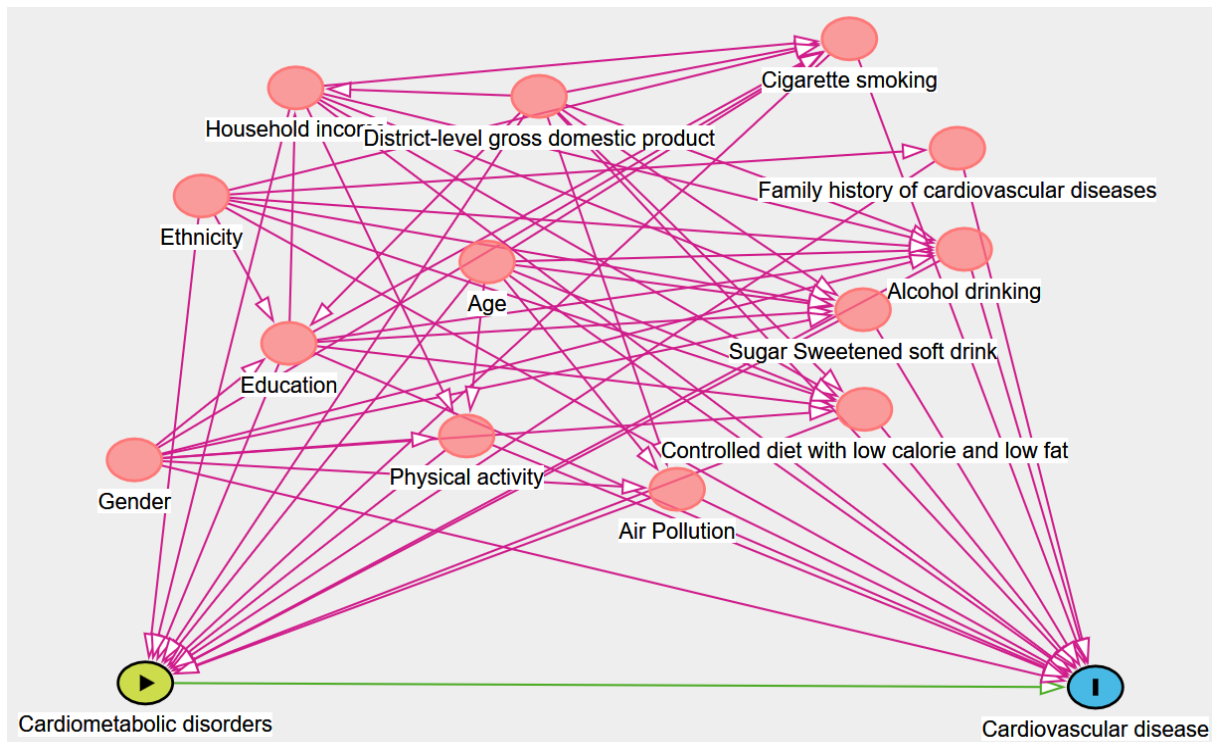

Created with the help of DAGitty.net ([www.dagitty.net](http://www.dagitty.net)). Minimally sufficient adjustment set: age, sex, ethnicity, education, household income, physical activity, district-level gross domestic product, air pollution (PM<sub>2.5</sub>), alcohol drinking, cigarette smoking, controlled diet with low calorie and low fat, sugar-sweetened soft drink, and family history of cardiovascular diseases.

**eFigure 4.** Three-Way Decomposition Encompassing Decompositions for Both Mediation and Interaction

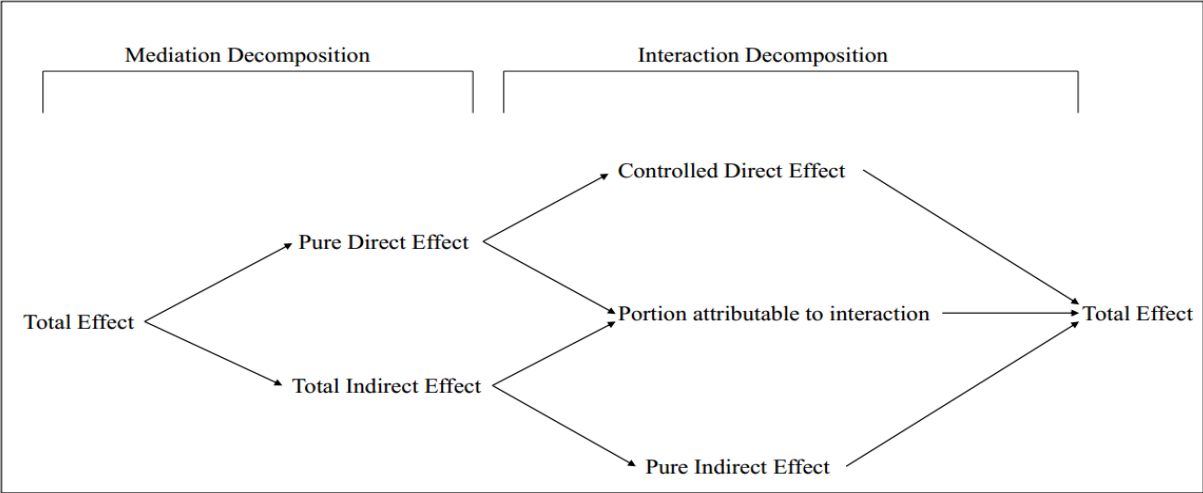



**eFigure 5.** Dose-Response Curves for Greenness Levels With CVD Prevalence

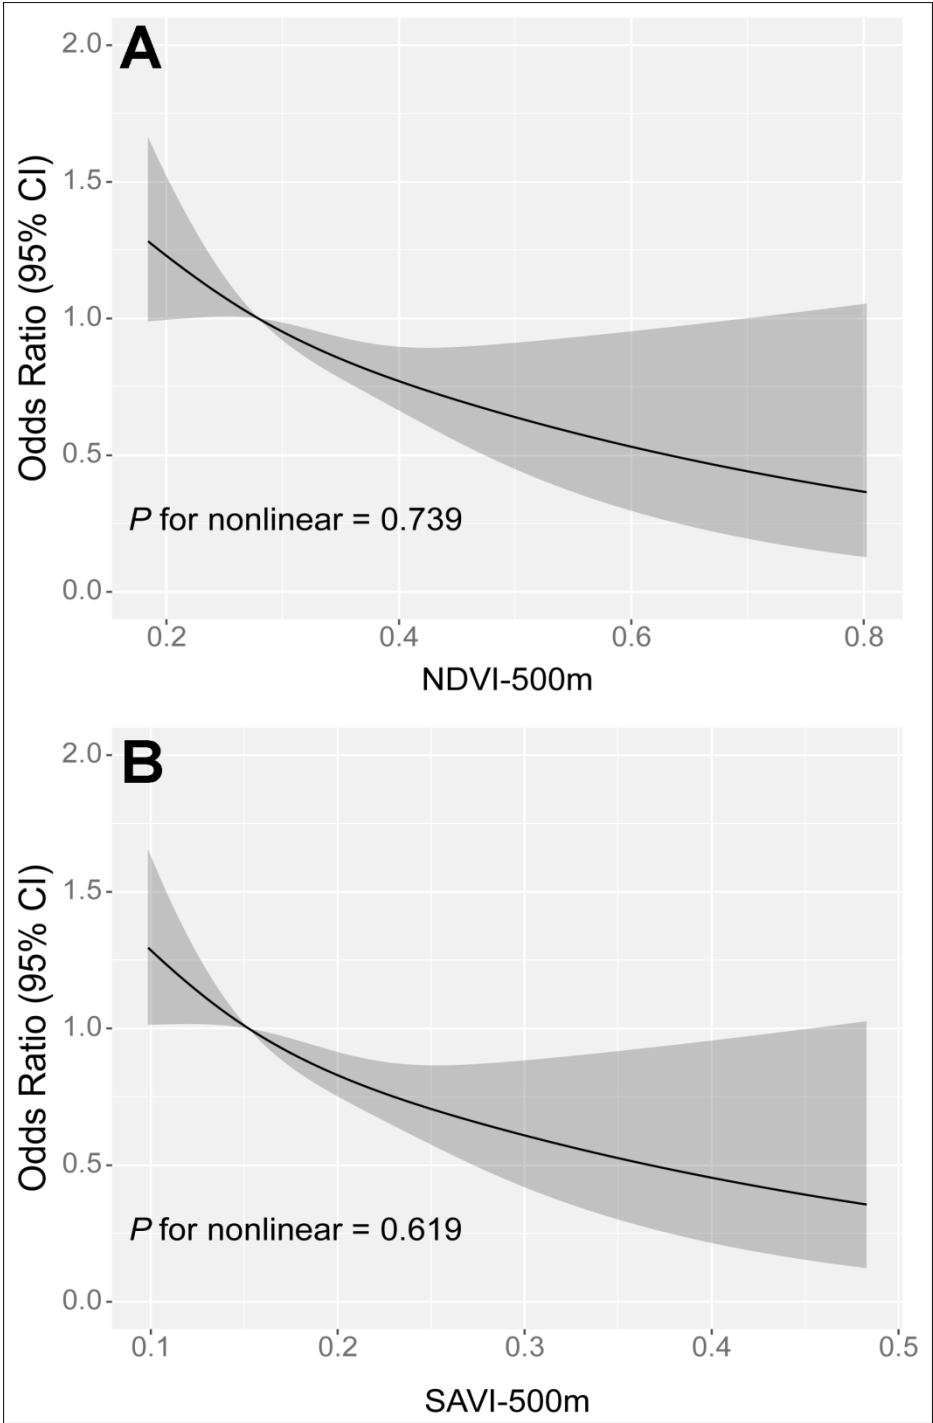

## eReferences

1. Hu Z, Liebens J, Rao KR (2008) Linking stroke mortality with air pollution, income, and greenness in northwest Florida: an ecological geographical study. *Int J Health Geogr* 7: 20.
2. Mitchell R, Popham F (2008) Effect of exposure to natural environment on health inequalities: an observational population study. *Lancet* 372: 1655-1660.
3. Maas J, Verheij RA, de Vries S, Spreeuwenberg P, Schellevis FG, et al. (2009) Morbidity is related to a green living environment. *J Epidemiol Community Health* 63: 967-973.
4. Richardson E, Pearce J, Mitchell R, Day P, Kingham S (2010) The association between green space and cause-specific mortality in urban New Zealand: an ecological analysis of green space utility. *BMC Public Health* 10: 240.
5. Dominguez-Berjon MF, Gandarillas A, Segura DPJ, Zorrilla B, Soto MJ, et al. (2010) Census tract socioeconomic and physical environment and cardiovascular mortality in the Region of Madrid (Spain). *J Epidemiol Community Health* 64: 1086-1093.
6. Coutts C, Horner M, Chapin T (2010) Using geographical information system to model the effects of green space accessibility on mortality in Florida. *Geocarto International* 25: 471-484.
7. Richardson EA, Mitchell R (2010) Gender differences in relationships between urban green space and health in the United Kingdom. *Social Science Medicine* 71: 568-575.
8. Richardson EA, Mitchell R, Hartig T, de Vries S, Astell-Burt T, et al. (2012) Green cities and health: a question of scale? *J Epidemiol Community Health* 66: 160-165.
9. Pereira G, Foster S, Martin K, Christian H, Boruff BJ, et al. (2012) The association between neighborhood greenness and cardiovascular disease: an observational study. *BMC Public Health* 12: 466.
10. Donovan GH, Butry DT, Michael YL, et al. The relationship between trees and human health: Evidence from the spread of the Emerald Ash Borer. *Am J Prev Med.* 2013; 44(2): 139-145.
11. Richardson EA, Pearce J, Mitchell R, Kingham S (2013) Role of physical activity in the relationship between urban green space and health. *Public Health* 127: 318-324.
12. Tamosiunas A, Grazuleviciene R, Luksiene D, Dedele A, Reklaitiene R, et al. (2014) Accessibility and use of urban green spaces, and cardiovascular health: findings from a Kaunas cohort study. *Environ Health* 13: 20.
13. Lachowycz K, Jones AP (2014) Does walking explain associations between access to greenspace and lower mortality? *Soc Sci Med* 107: 9-17.
14. Wilker EH, Wu CD, McNeely E, Mostofsky E, Spengler J, et al. (2014) Green space and mortality following ischemic stroke. *Environ Res* 133: 42-48.
15. Bixby H, Hodgson S, Fortunato L, Hansell A, Fecht D (2015) Associations between green space and health in English cities: an ecological, cross-sectional study. *PLoS One* 10: e119495.
16. Chum A, O'Campo P (2015) Cross-sectional associations between residential environmental exposures and cardiovascular diseases. *BMC Public Health* 15: 438.
17. Donovan GH, Michael YL, Gatzliolis D, Prestemon JP, Whitsel EA (2015) Is tree loss associated with cardiovascular-disease risk in the Women's Health Initiative? A natural experiment. *Health Place* 36: 1-7.
18. James P, Hart JE, Banay RF, Laden F (2016) Exposure to Greenness and Mortality in a Nationwide Prospective Cohort Study of Women. *Environ Health Perspect* 124: 1344-1352.
19. Massa KH, Pabayo R, Lebrao ML, Chiavegatto FA (2016) Environmental factors and cardiovascular diseases: the association of income inequality and green spaces in elderly residents of Sao Paulo, Brazil. *BMJ Open* 6: e11850.
20. Ngom R, Gosselin P, Blais C, Rochette L (2016) Type and Proximity of Green Spaces Are Important for Preventing Cardiovascular Morbidity and Diabetes--A Cross-Sectional Study for Quebec, Canada. *Int J Environ Res Public Health* 13: 423.

21. Picavet H, Milder I, Kruize H, de Vries S, Hermans T, et al. (2016) Greener living environment healthier people?: Exploring green space, physical activity and health in the Doetinchem Cohort Study. *Prev Med* 89: 7-14.
22. Vienneau D, de Hoogh K, Faeh D, Kaufmann M, Wunderli JM, et al. (2017) More than clean air and tranquillity: Residential green is independently associated with decreasing mortality. *Environ Int* 108: 176-184.
23. Wang D, Lau KK, Yu R, Wong S, Kwok T, et al. (2017) Neighbouring green space and mortality in community-dwelling elderly Hong Kong Chinese: a cohort study. *BMJ Open* 7: e15794.
24. Yitshak-Sade M, Kloog I, Novack V (2017) Do air pollution and neighborhood greenness exposures improve the predicted cardiovascular risk? *Environ Int* 107: 147-153.
25. Crouse DL, Pinault L, Balram A, Hystad P, Peters PA, et al. (2017) Urban greenness and mortality in Canada's largest cities: a national cohort study. *Lancet Planet Health* 1: e289-e297.
26. Jia X, Yu Y, Xia W, Masri S, Sami M, et al. (2018) Cardiovascular diseases in middle aged and older adults in China: the joint effects and mediation of different types of physical exercise and neighborhood greenness and walkability. *Environ Res* 167: 175-183.
27. Silveira I, Junger WL (2018) Green spaces and mortality due to cardiovascular diseases in the city of Rio de Janeiro. *Rev Saude Publica* 52: 49.
28. Astell-Burt T, Feng X (2019) Urban green space, tree canopy and prevention of cardiometabolic diseases: a multilevel longitudinal study of 46 786 Australians. *Int J Epidemiol*. Doi: 10.1093/ije/dyz239.
29. Orioli R, Antonucci C, Scortichini M, Cerza F, Marando F, et al. (2019) Exposure to Residential Greenness as a Predictor of Cause-Specific Mortality and Stroke Incidence in the Rome Longitudinal Study. *Environ Health Perspect* 127: 27002.
30. Kim S, Kim H, Lee JT (2019) Interactions between Ambient Air Particles and Greenness on Cause-specific Mortality in Seven Korean Metropolitan Cities, 2008-2016. *Int J Environ Res Public Health* 16: 1866.
31. Servadio JL, Lawal AS, Davis T, Bates J, Russell AG, et al. (2019) Demographic Inequities in Health Outcomes and Air Pollution Exposure in the Atlanta Area and its Relationship to Urban Infrastructure. *J Urban Health* 96: 219-234.
32. Wang K, Lombard J, Rundek T, Dong C, Gutierrez CM, et al. (2019) Relationship of Neighborhood Greenness to Heart Disease in 249 405 US Medicare Beneficiaries. *J Am Heart Assoc* 8: e10258.
33. Zijlema WL, Stasinska A, Blake D, Dirgawati M, Flicker L, et al. (2019) The longitudinal association between natural outdoor environments and mortality in 9218 older men from Perth, Western Australia. *Environ Int* 125: 430-436.
